# Supplementary material for: Clinical scoring system for the prediction of survival of patients with advanced gastric cancer
Source: PubMed Central journal article supplement — ESMO Open. 2020 Mar 17;5(2):e000670. doi: 10.1136/esmoopen-2020-000670 (PMC7078777; doi:10.1136/esmoopen-2020-000670), 2020-03-17

**Supporting Information**

Table S1. Baseline characteristics of included patients.

Table S2. Baseline characteristics of a randomly selected imputed data set and determined cut-off values of continuous variables.

Figure S1. Hazard ratio by the risk score and pairwise comparisons using log-rank test (training set).

Figure S2. Kaplan-meier survival curve by the risk score of training dataset.

Figure S3. A calibration plot of the risk scores: Between predicted and observed survival probability at one-year.

Figure S4. Receiver operating characteristic curve for predicting death based on the hazard function calculated at one-year.

Table S1. Baseline characteristics

|                                | Training set<br>(N=1156)<br>Mean ± SD | Validation set<br>(N=577)<br>Mean ± SD | P-value |
|--------------------------------|---------------------------------------|----------------------------------------|---------|
| AGE                            | 57.3 ± 12.3                           | 56.3 ± 12.3                            | 0.109   |
| Gender                         |                                       |                                        | 0.965   |
| - Female                       | 418 (36.2%)                           | 210 (36.4%)                            |         |
| - Male                         | 738 (63.8%)                           | 367 (63.6%)                            |         |
| HER2                           |                                       |                                        | 0.093   |
| - NEGATIVE                     | 1020 (88.2%)                          | 492 (85.3%)                            |         |
| - POSITIVE                     | 136 (11.8%)                           | 85 (14.7%)                             |         |
| White blood cell               | 6.2 ± 2.9                             | 6.1 ± 3.1                              | 0.492   |
| - Data missing                 | 115 (9.9%)                            | 59 (10.2%)                             |         |
| Hemoglobin                     | 11.3 ± 1.8                            | 11.4 ± 1.8                             | 0.370   |
| - Data missing                 | 121 (10.5%)                           | 61 (10.6%)                             |         |
| Platelet                       | 236.0 ± 96.9                          | 236.6 ± 104.5                          | 0.910   |
| - Data missing                 | 115 (9.9%)                            | 59 (10.2%)                             |         |
| Absolute neutrophil count      | 3.7 ± 2.7                             | 3.7 ± 3.0                              | 0.799   |
| - Data missing                 | 118 (10.2%)                           | 60 (10.4%)                             |         |
| Absolute lymphocyte count      | 1.7 ± 0.7                             | 1.7 ± 0.6                              | 0.233   |
| - Data missing                 | 92 (8.0%)                             | 46 (8.0%)                              |         |
| Neutrophil-lymphocyte ratio    | 2.7 ± 3.0                             | 2.8 ± 4.0                              | 0.514   |
| - Data missing                 | 131 (11.3%)                           | 65 (11.3%)                             |         |
| Histologic differentiation     |                                       |                                        | 0.542   |
| - Data missing                 | 136 (11.8%)                           | 75 (13.0%)                             |         |
| - Poor/Signet ring cell/Others | 799 (69.1%)                           | 401 (69.5%)                            |         |
| - Well/Moderately              | 221 (19.1%)                           | 101 (17.5%)                            |         |
| Peritoneal carcinomatosis      |                                       |                                        | 0.464   |
| - No                           | 566 (49.0%)                           | 271 (47.0%)                            |         |
| - Yes                          | 590 (51.0%)                           | 306 (53.0%)                            |         |
| Performance status             |                                       |                                        | 0.992   |
| - Good (0/1)                   | 984 (85.1%)                           | 492 (85.3%)                            |         |
| - Poor (2/3)                   | 172 (14.9%)                           | 85 (14.7%)                             |         |
| Previous gastrectomy           |                                       |                                        | 0.368   |
| - No                           | 909 (78.6%)                           | 442 (76.6%)                            |         |
| - Yes                          | 247 (21.4%)                           | 135 (23.4%)                            |         |
| Blood urea nitrogen            | 14.3 ± 5.8                            | 14.3 ± 5.6                             | 0.866   |
| - Data missing                 | 79 (6.8%)                             | 34 (5.9%)                              |         |
| Creatinine                     | 0.8 ± 0.2                             | 0.8 ± 0.2                              | 0.662   |
| - Data missing                 | 88 (7.6%)                             | 40 (6.9%)                              |         |
| Uric acid                      | 4.5 ± 1.5                             | 4.5 ± 1.4                              | 0.859   |
| - Data missing                 | 124 (10.7%)                           | 57 (9.9%)                              |         |
| Protein                        | 6.7 ± 0.7                             | 6.7 ± 0.7                              | 0.462   |
| - Data missing                 | 84 (7.3%)                             | 37 (6.4%)                              |         |
| Albumin                        | 3.9 ± 0.5                             | 4.0 ± 0.5                              | 0.417   |
| - Data missing                 | 81 (7.0%)                             | 35 (6.1%)                              |         |

|                                      |               |               |       |
|--------------------------------------|---------------|---------------|-------|
| Total bilirubin                      | 0.6 ± 0.5     | 0.6 ± 0.5     | 0.587 |
| - Data missing                       | 88 (7.6%)     | 38 (6.6%)     |       |
| ALT                                  | 21.6 ± 20.8   | 22.8 ± 26.9   | 0.355 |
| - Data missing                       | 78 (6.7%)     | 33 (5.7%)     |       |
| ALP                                  | 131.8 ± 285.9 | 123.3 ± 205.0 | 0.496 |
| - Data missing                       | 82 (7.1%)     | 40 (6.9%)     |       |
| Creatinine clearance                 | 94.4 ± 25.4   | 93.5 ± 22.8   | 0.468 |
| - Data missing                       | 79 (6.8%)     | 35 (6.1%)     |       |
| Regimen                              |               |               | 0.118 |
| - FOLFOX                             | 107 (9.3%)    | 48 (8.3%)     |       |
| - Trastuzumab+capecitabine+cisplatin | 82 (7.1%)     | 60 (10.4%)    |       |
| - capecitabine+oxaliplatin           | 672 (58.1%)   | 320 (55.5%)   |       |
| - capecitabine or TS-1+cisplatin     | 295 (25.5%)   | 149 (25.8%)   |       |
| Best Response                        |               |               | 0.503 |
| - Data missing                       | 158 (13.6%)   | 90 (15.6%)    |       |
| - complete remission                 | 27 (2.4%)     | 17 (2.9%)     |       |
| - partial response                   | 344 (29.9%)   | 151 (26.2%)   |       |
| - stable disease                     | 438 (37.8%)   | 224 (38.8%)   |       |
| - progressive disease                | 189 (16.3%)   | 95 (16.5%)    |       |

SD, standard deviation; HER2, human epidermal growth factor receptor 2; ALT, alanine aminotransferase; ALP, alkaline phosphatase; FOLFOX, 5-fluorouracil plus leucovorin plus oxaliplatin

Table S2. Baseline characteristics of a randomly selected imputed data set and determined cut-off values of continuous variables.

|                                                               | Training set<br>(N=1156) | Validation set<br>(N=577) | P-value |
|---------------------------------------------------------------|--------------------------|---------------------------|---------|
| White blood cell                                              |                          |                           | 0.387   |
| - High White blood cell ( $>6.6 \times 10^3$ /uL)             | 392 (33.9%)              | 183 (31.7%)               |         |
| - Low White blood cell ( $\leq 6.6 \times 10^3$ /uL)          | 764 (66.1%)              | 394 (68.3%)               |         |
| Hemoglobin                                                    |                          |                           | 0.953   |
| - High Hemoglobin ( $>10.0$ g/dL)                             | 865 (74.8%)              | 431 (74.7%)               |         |
| - Low Hemoglobin ( $\leq 10.0$ g/dL)                          | 291 (25.2%)              | 146 (25.3%)               |         |
| Platelet                                                      |                          |                           | 0.238   |
| - High Platelet ( $>210 \times 10^3$ /uL)                     | 658 (56.9%)              | 311 (53.9%)               |         |
| - Low Platelet ( $\leq 210 \times 10^3$ /uL)                  | 498 (43.1%)              | 266 (46.1%)               |         |
| Absolute neutrophil count                                     |                          |                           | 0.702   |
| - High Absolute neutrophil count ( $>5.2 \times 10^3$ /uL)    | 234 (20.2%)              | 112 (19.4%)               |         |
| - Low Absolute neutrophil count ( $\leq 5.2 \times 10^3$ /uL) | 922 (79.8%)              | 465 (80.6%)               |         |
| Absolute lymphocyte count                                     |                          |                           | 0.756   |
| - High Absolute lymphocyte count ( $>1.2 \times 10^3$ /uL)    | 913 (79.0%)              | 452 (78.3%)               |         |
| - Low Absolute lymphocyte count ( $\leq 1.2 \times 10^3$ /uL) | 243 (21.0%)              | 125 (21.7%)               |         |
| Neutrophil-lymphocyte ratio                                   |                          |                           | 0.351   |
| - High Neutrophil-lymphocyte ratio ( $>3.0$ )                 | 288 (24.9%)              | 156 (27.0%)               |         |
| - Low Neutrophil-lymphocyte ratio ( $\leq 3.0$ )              | 868 (75.1%)              | 421 (73.0%)               |         |
| Histologic differentiation                                    |                          |                           | 0.542   |
| - Poor/Signet ring cell/Others                                | 889 (76.9%)              | 452 (78.3%)               |         |
| - Well/Moderately                                             | 267 (23.1%)              | 125 (21.7%)               |         |
| Blood urea nitrogen                                           |                          |                           | 1.000   |
| - High Blood urea nitrogen ( $>20.0$ mg/dL)                   | 141 (12.2%)              | 70 (12.1%)                |         |
| - Low Blood urea nitrogen ( $\leq 20.0$ mg/dL)                | 1015 (87.8%)             | 507 (87.9%)               |         |
| Creatinine                                                    |                          |                           | 0.661   |
| - High Creatinine ( $>0.7$ mg/dL)                             | 794 (68.7%)              | 390 (67.6%)               |         |
| - Low Creatinine ( $\leq 0.7$ mg/dL)                          | 362 (31.3%)              | 187 (32.4%)               |         |
| Uric acid                                                     |                          |                           | 0.396   |
| - High Uric acid ( $>3.0$ mg/dL)                              | 973 (84.2%)              | 495 (85.8%)               |         |

|                                                                     |              |             |       |
|---------------------------------------------------------------------|--------------|-------------|-------|
| - Low Uric acid ( $\leq 3.0$ mg/dL)                                 | 183 (15.8%)  | 82 (14.2%)  |       |
| Protein                                                             |              |             | 0.744 |
| - High Protein ( $> 6.0$ g/dL)                                      | 968 (83.7%)  | 478 (82.8%) |       |
| - Low Protein ( $\leq 6.0$ g/dL)                                    | 188 (16.3%)  | 99 (17.2%)  |       |
| Albumin                                                             |              |             | 0.654 |
| - High Albumin ( $> 3.5$ g/dL)                                      | 924 (79.9%)  | 467 (80.9%) |       |
| - Low Albumin ( $\leq 3.5$ g/dL)                                    | 232 (20.1%)  | 110 (19.1%) |       |
| Total bilirubin                                                     |              |             | 0.423 |
| - High Total bilirubin ( $> 0.5$ mg/dL)                             | 396 (34.3%)  | 209 (36.2%) |       |
| - Low Total bilirubin ( $\leq 0.5$ mg/dL)                           | 760 (65.7%)  | 368 (63.8%) |       |
| ALT                                                                 |              |             | 0.294 |
| - High ALT ( $> 34$ U/L)                                            | 147 (12.7%)  | 84 (14.6%)  |       |
| - Low ALT ( $\leq 34$ U/L)                                          | 1009 (87.3%) | 493 (85.4%) |       |
| ALP                                                                 |              |             | 1.000 |
| - High ALP ( $> 140$ U/L)                                           | 176 (15.2%)  | 87 (15.1%)  |       |
| - Low ALP ( $\leq 140$ U/L)                                         | 980 (84.8%)  | 490 (84.9%) |       |
| Creatinine clearance                                                |              |             | 0.565 |
| - High Creatinine clearance ( $> 105$ mL/min/1.73m <sup>2</sup> )   | 300 (26.0%)  | 148 (25.6%) |       |
| - Low Creatinine clearance ( $\leq 105$ mL/min/1.73m <sup>2</sup> ) | 856 (74.0%)  | 429 (74.4%) |       |

---

ALT, alanine aminotransferase; ALP, alkaline phosphatase.

Figure S1. Hazard ratio by the risk score and pairwise comparisons using log-rank test (training set).

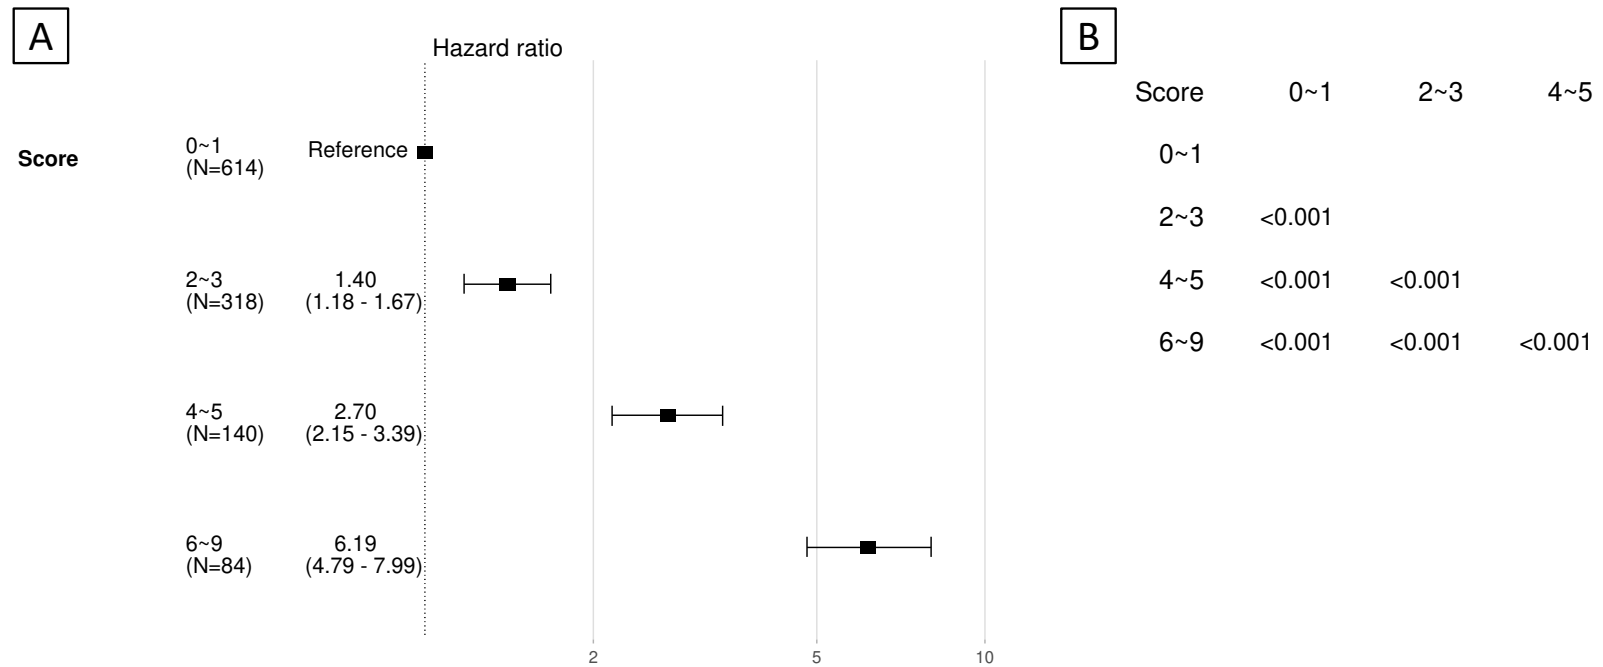

Figure S2. Kaplan-meier survival curve by the risk score of training dataset

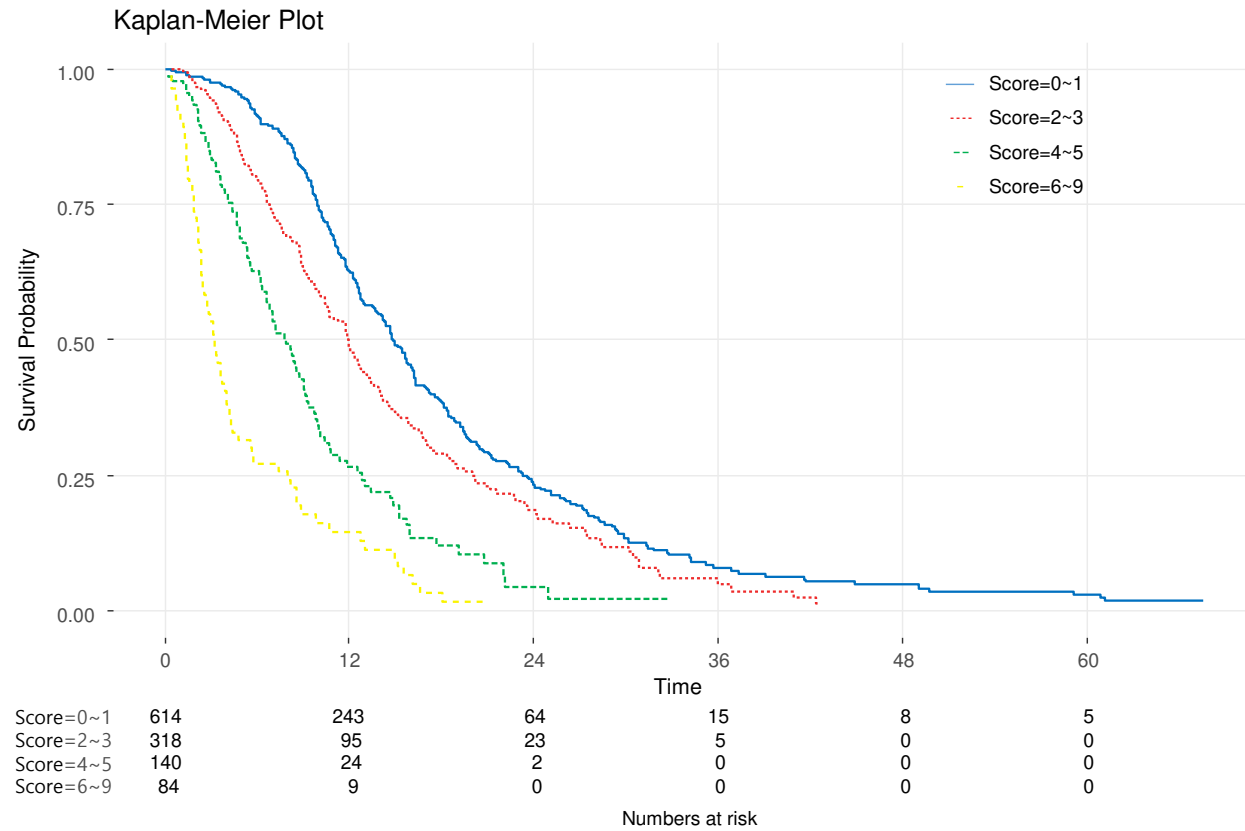

Figure S3. A calibration plot of the risk scores: Between predicted and observed survival probability at one-year

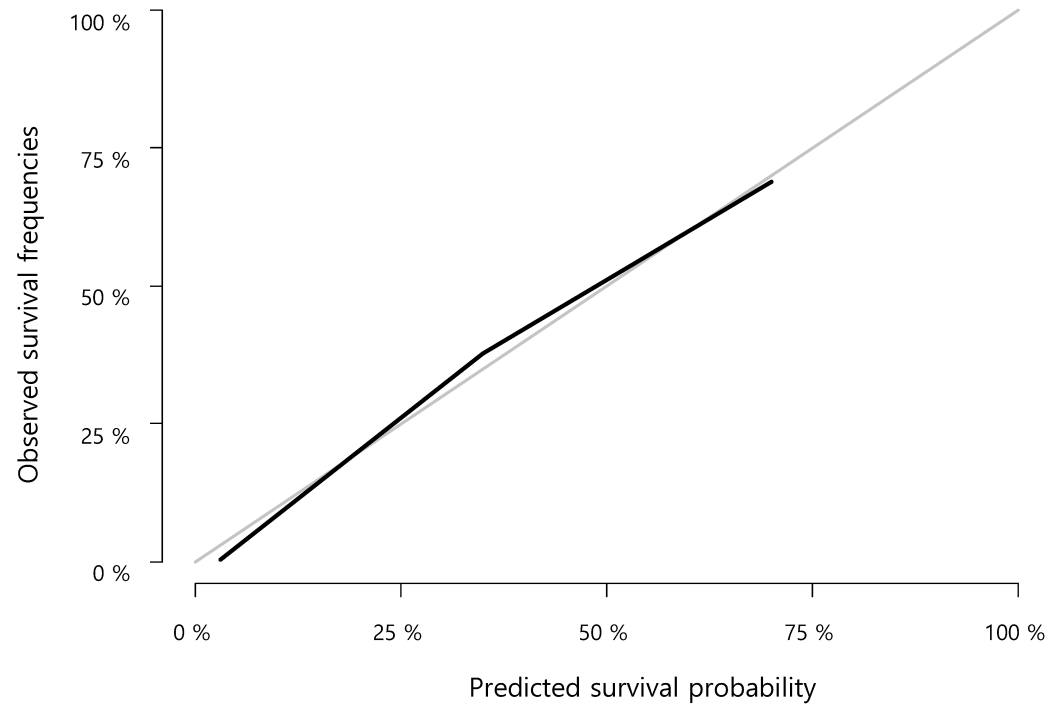



Figure S4. Receiver operating characteristic curve for predicting death based on the hazard function calculated at one-year

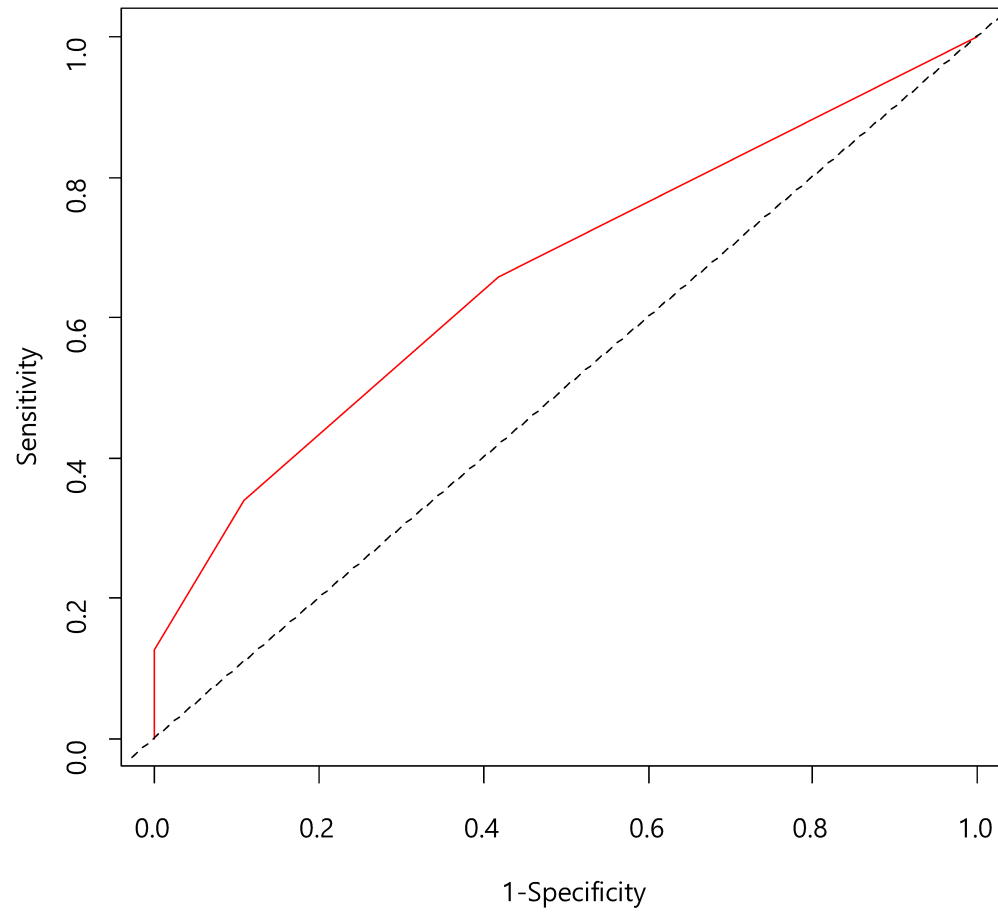

Supplement: esmoopen-2020-000670supp001.pdf [file esmoopen-2020-000670supp001.pdf]
